# Supplementary material for: Relationship Between Serum NMDA Receptor Antibodies and Response to Antipsychotic Treatment in First-Episode Psychosis
Source: PubMed Central journal article supplement (PMC8191702; doi:10.1016/j.biopsych.2020.11.014), 2021-07-01
Supplement: mmc1.pdf [file mmc1.pdf]

## Relationship Between Serum NMDA Receptor Antibodies and Response to Antipsychotic Treatment in First-Episode Psychosis

### *Supplement*

Table S1: Baseline demographic and clinical information in subjects who were included and excluded from analysis of amisulpride treatment response. Continuous variables given as mean  $\pm$  SD unless otherwise indicated.

|                                                         | <b>Total FEP cohort<br/>(n=387)</b>                                       | <b>Included (n=295)</b>                                                | <b>Excluded (n=92)</b>                                                | <b>P (included vs<br/>excluded)</b> |
|---------------------------------------------------------|---------------------------------------------------------------------------|------------------------------------------------------------------------|-----------------------------------------------------------------------|-------------------------------------|
| <b>Age</b>                                              | 25.44 $\pm$ 6.10                                                          | 25.48 $\pm$ 5.91                                                       | 25.33 $\pm$ 6.70                                                      | 0.831                               |
| <b>Sex [M: n (%)]</b>                                   | 261 (67.4)                                                                | 253 (68.0)                                                             | 8 (53.3)                                                              | 0.265                               |
| <b>Ethnicity [n (%)]</b>                                | White 346 (89.6),<br>Black 16 (4.1),<br>Asian 13 (3.4),<br>Other 11 (2.9) | White 271 (91.9),<br>Black 8 (2.7),<br>Asian 9 (3.1),<br>Other 7 (2.4) | White 75 (82.4),<br>Black 8 (8.8),<br>Asian 4 (4.4),<br>Other 4 (4.4) | <b>0.041</b>                        |
| <b>Smoker? [n (%)]<br/>N=385</b>                        | 192 (49.9)                                                                | 150 (50.8)                                                             | 42 (46.7)                                                             | 0.786                               |
| <b>BMI</b>                                              | 23.41 $\pm$ 5.20                                                          | 23.34 $\pm$ 4.21                                                       | 23.68 $\pm$ 7.63                                                      | 0.688                               |
| <b>Recreational drug<br/>use ever [n (%)]<br/>N=386</b> | 184 (47.7)                                                                | 136 (46.4)                                                             | 47 (51.6)                                                             | 0.403                               |
| <b>Duration of<br/>psychosis (months)</b>               | 6.05 (median 4.0;<br>IQR 2-8)                                             | 6.52 (median 4.0;<br>IQR 2-8)                                          | 4.57 (median<br>3.0; IQR 1-6)                                         | <b>0.041</b>                        |
| <b>NMDAR antibodies</b>                                 | 15 (3.9%)                                                                 | 11 (3.7%)                                                              | 4 (4.3%)                                                              | 0.761                               |
| <b>PANSS total<br/>(baseline)</b>                       | 78.66 $\pm$ 18.99                                                         | 78.39 $\pm$ 19.11                                                      | 79.55 $\pm$ 18.64                                                     | 0.610                               |
| <b>PANSS positive<br/>(baseline)</b>                    | 20.12 $\pm$ 5.58                                                          | 20.02 $\pm$ 5.63                                                       | 20.46 $\pm$ 5.42                                                      | 0.510                               |
| <b>PANSS negative<br/>(baseline)</b>                    | 19.81 $\pm$ 7.10                                                          | 19.82 $\pm$ 7.14                                                       | 19.77 $\pm$ 7.00                                                      | 0.955                               |
| <b>PANSS general<br/>(baseline)</b>                     | 38.73 $\pm$ 9.98                                                          | 38.55 $\pm$ 9.82                                                       | 39.32 $\pm$ 10.51                                                     | 0.521                               |
| <b>CDSS (baseline)</b>                                  | 13.31 $\pm$ 4.48                                                          | 13.39 $\pm$ 4.54                                                       | 13.01 $\pm$ 4.23                                                      | 0.489                               |
| <b>CGI (baseline)</b>                                   | 5.53 $\pm$ 0.93                                                           | 5.50 $\pm$ 0.94                                                        | 5.64 $\pm$ 0.92                                                       | 0.204                               |

Table S2: number of participants by country and site. Individual centres listed below.

| Country        | Total FEP cohort (n = 387) | Included in analysis of treatment response (n = 295) |
|----------------|----------------------------|------------------------------------------------------|
| Australia      | 8                          | 5                                                    |
| Austria        | 2                          | 2                                                    |
| Belgium        | 2                          | 2                                                    |
| Bulgaria       | 3                          | 3                                                    |
| Czech Republic | 19                         | 17                                                   |
| Denmark        | 42                         | 30                                                   |
| France         | 1                          | 0                                                    |
| Germany        | 27                         | 20                                                   |
| Israel         | 66                         | 50                                                   |
| Italy          | 38                         | 28                                                   |
| Netherlands    | 10                         | 8                                                    |
| Poland         | 31                         | 29                                                   |
| Romania        | 22                         | 19                                                   |
| Spain          | 86                         | 58                                                   |
| Switzerland    | 10                         | 6                                                    |
| United Kingdom | 20                         | 18                                                   |

**Australia**

Orygen Youth Health, 35 Poplar Rd, Parkville VIC 3052, Australia

**Austria**

Department of Biological Psychiatry, Innsbruck University Clinics, Innsbruck, Austria, A-6020

**Belgium**

Katholieke Universiteit Leuven (KU Leuven), Leuven, Belgium, B – 3070

**Bulgaria**

University Specialised Hospital for Active Treatment in Neurology and Psychiatry "St. Naum", Sofia, Bulgaria, 1113

**Czech Republic**

Psychiatrické centrum Praha, Prague, Ustavni 91, Czech Republic, 181 03 Praha 8-Bohnice

Psychiatrická klinika LF UK, Fakultní nemocnice, Hradec Králové, Czech Republic, CZ - 500 05

**Denmark**

Center for Neuropsychiatric Research, Glostrup, Denmark, DK-2600

**France**

Institut National de la Santé et de la Reserche Médicale (INSERM), Créteil Cedex, France, 94010

**Germany**

Martin-Luther-University (MLU) of Halle-Wittenberg, Halle, Germany, 06097

Ludwig-Maximilians University München, München, Germany, 80336

Technische Universität München (TUM), München, Germany, 81675

**Israel**

Sheba Medical Centre Department of Psychiatry, Tel Hashomer, Israel, 52621

**Italy**

Department of Psychiatry University of Naples, Naples, Italy, 80138

**Netherlands**

University Medical Center Utrecht  
Utrecht, Netherlands, 3584 CX

**Poland**

Department of Adult Psychiatry, University of Medical Sciences, Poznan, Poland, 60-572

**Romania**

Obregia Psychiatric Hospital, Bucuresti, Romania, 7000

**Spain**

Hospital Clinic i Provincial, Barcelona, Spain, 08036 Barcelona

Servicio Madrileño de Salud (SERMAS), Madrid, Spain, 28007

Hospital Clínico San Carlos, Madrid, Spain, 28040 Madrid

Instituto de Investigación Hospital 12 de Octubre, Madrid, Spain, 28041 Madrid

Universidad de Oviedo, Oviedo, Spain, 33011 Oviedo

**Switzerland**

Clenia Schlössli AG, Privatklinik für Psychiatrie und Psychotherapie, Oetwil am See/Zürich, Switzerland, CH-8618

**United Kingdom**

King's College London, Departments of Psychological Medicine, Psychiatry & Cognitive Neuroscience, London, United Kingdom, SE5 8AF

West London Mental Health Trust, London, United Kingdom, W12 0NN

University of Manchester, Manchester, United Kingdom, M13 9PL
